# Supplementary material
Source: publisher figshare collection journal article supplement (https://acs.figshare.com/ndownloader/files/5815923)
Supplement: Supplementary file 1 [file 5815923]

ATOM      1 ZN   MOL     1       3.156  -0.252   0.016  1.00  0.00
ATOM      2 ZN   MOL     1       0.044   0.284   1.772  1.00  0.00
ATOM      3  O   MOL     1       1.052  -0.868   0.160  1.00  0.00
ATOM      4  O   MOL     1       2.180   1.032   1.640  1.00  0.00
ATOM      5  O   MOL     1      -0.096   2.120   3.056  1.00  0.00
ATOM      6  O   MOL     1       2.088   0.448  -1.884  1.00  0.00
ATOM      7  O   MOL     1       0.292  -1.044   3.568  1.00  0.00
ATOM      8  C   MOL     1       1.092  -2.276   0.372  1.00  0.00
ATOM      9  C   MOL     1       4.340   1.836   2.344  1.00  0.00
ATOM     10  C   MOL     1       2.832   1.816   2.472  1.00  0.00
ATOM     11  C   MOL     1       2.228   2.648   3.428  1.00  0.00
ATOM     12  C   MOL     1       0.824   2.768   3.672  1.00  0.00
ATOM     13  C   MOL     1       0.368   3.784   4.748  1.00  0.00
ATOM     14  C   MOL     1       0.964   3.372   6.108  1.00  0.00
ATOM     15  C   MOL     1      -1.152   3.808   4.860  1.00  0.00
ATOM     16  C   MOL     1       0.868   5.188   4.364  1.00  0.00
ATOM     17  C   MOL     1       4.124   1.468  -2.660  1.00  0.00
ATOM     18  C   MOL     1       2.644   1.184  -2.824  1.00  0.00
ATOM     19  C   MOL     1       1.984   1.716  -3.940  1.00  0.00
ATOM     20  C   MOL     1      -0.560  -1.692   4.260  1.00  0.00
ATOM     21  C   MOL     1      -0.040  -2.408   5.532  1.00  0.00
ATOM     22  C   MOL     1      -0.772  -1.852   6.764  1.00  0.00
ATOM     23  C   MOL     1       1.464  -2.172   5.704  1.00  0.00
ATOM     24  C   MOL     1      -0.292  -3.920   5.404  1.00  0.00
ATOM     25  C   MOL     1       4.912  -1.124   0.032  1.00  0.00
ATOM     26  C   MOL     1       5.264  -1.808   1.332  1.00  0.00
ATOM     27 ZN   MOL     1      -0.036  -0.300  -1.680  1.00  0.00
ATOM     28 ZN   MOL     1      -3.148   0.244   0.076  1.00  0.00
ATOM     29  O   MOL     1      -1.040   0.852  -0.068  1.00  0.00
ATOM     30  O   MOL     1      -2.080  -0.444   1.988  1.00  0.00
ATOM     31  C   MOL     1       0.588   1.584  -4.232  1.00  0.00
ATOM     32  C   MOL     1      -1.952  -1.832   3.960  1.00  0.00
ATOM     33  O   MOL     1      -2.172  -1.052  -1.528  1.00  0.00
ATOM     34  O   MOL     1       0.092  -2.136  -2.968  1.00  0.00
ATOM     35  O   MOL     1      -0.272   0.992  -3.496  1.00  0.00
ATOM     36  C   MOL     1      -4.896   1.128   0.052  1.00  0.00
ATOM     37  C   MOL     1      -1.072   2.260  -0.300  1.00  0.00
ATOM     38  C   MOL     1      -2.620  -1.252   2.872  1.00  0.00
ATOM     39  C   MOL     1       0.076   2.236  -5.540  1.00  0.00
ATOM     40  C   MOL     1      -2.824  -1.848  -2.352  1.00  0.00
ATOM     41  C   MOL     1      -0.828  -2.784  -3.580  1.00  0.00
ATOM     42  C   MOL     1      -5.260   1.764  -1.268  1.00  0.00
ATOM     43  C   MOL     1      -4.096  -1.556   2.684  1.00  0.00
ATOM     44  C   MOL     1       0.820   1.620  -6.736  1.00  0.00
ATOM     45  C   MOL     1      -1.428   1.992  -5.708  1.00  0.00
ATOM     46  C   MOL     1       0.332   3.752  -5.480  1.00  0.00
ATOM     47  C   MOL     1      -4.336  -1.876  -2.200  1.00  0.00
ATOM     48  C   MOL     1      -2.232  -2.676  -3.312  1.00  0.00
ATOM     49  C   MOL     1      -0.384  -3.784  -4.668  1.00  0.00
ATOM     50  C   MOL     1      -1.004  -3.368  -6.016  1.00  0.00
ATOM     51  C   MOL     1       1.136  -3.792  -4.808  1.00  0.00
ATOM     52  C   MOL     1      -0.860  -5.200  -4.284  1.00  0.00
ATOM     53  H   MOL     1       0.576  -2.524   1.356  1.00  0.00
ATOM     54  H   MOL     1       2.180  -2.624   0.424  1.00  0.00
ATOM     55  H   MOL     1       0.568  -2.808  -0.480  1.00  0.00
ATOM     56  H   MOL     1       4.680   1.196   1.472  1.00  0.00
ATOM     57  H   MOL     1       4.804   1.428   3.292  1.00  0.00
ATOM     58  H   MOL     1       4.708   2.892   2.192  1.00  0.00
ATOM     59  H   MOL     1       2.908   3.268   4.056  1.00  0.00
ATOM     60  H   MOL     1       2.092   3.400   6.080  1.00  0.00
ATOM     61  H   MOL     1       0.632   2.328   6.380  1.00  0.00
ATOM     62  H   MOL     1       0.608   4.088   6.908  1.00  0.00
ATOM     63  H   MOL     1      -1.540   2.788   5.140  1.00  0.00
ATOM     64  H   MOL     1      -1.612   4.100   3.868  1.00  0.00
ATOM     65  H   MOL     1      -1.472   4.552   5.644  1.00  0.00
ATOM     66  H   MOL     1       0.464   5.480   3.352  1.00  0.00
ATOM     67  H   MOL     1       1.996   5.224   4.328  1.00  0.00
ATOM     68  H   MOL     1       0.508   5.940   5.128  1.00  0.00
ATOM     69  H   MOL     1       4.516   1.032  -1.688  1.00  0.00
ATOM     70  H   MOL     1       4.304   2.580  -2.660  1.00  0.00
ATOM     71  H   MOL     1       4.696   1.008  -3.516  1.00  0.00
ATOM     72  H   MOL     1       2.600   2.292  -4.656  1.00  0.00
ATOM     73  H   MOL     1      -1.884  -2.036   6.688  1.00  0.00
ATOM     74  H   MOL     1      -0.596  -0.740   6.852  1.00  0.00
ATOM     75  H   MOL     1      -0.392  -2.356   7.696  1.00  0.00
ATOM     76  H   MOL     1       1.680  -1.068   5.784  1.00  0.00
ATOM     77  H   MOL     1       2.028  -2.576   4.816  1.00  0.00
ATOM     78  H   MOL     1       1.832  -2.684   6.636  1.00  0.00
ATOM     79  H   MOL     1       0.196  -4.328   4.480  1.00  0.00
ATOM     80  H   MOL     1      -1.396  -4.140   5.348  1.00  0.00
ATOM     81  H   MOL     1       0.124  -4.452   6.308  1.00  0.00
ATOM     82  H   MOL     1       5.684  -0.340  -0.224  1.00  0.00
ATOM     83  H   MOL     1       4.860  -1.872  -0.812  1.00  0.00
ATOM     84  H   MOL     1       4.492  -2.584   1.616  1.00  0.00
ATOM     85  H   MOL     1       5.344  -1.064   2.180  1.00  0.00
ATOM     86  H   MOL     1       6.260  -2.336   1.252  1.00  0.00
ATOM     87  H   MOL     1      -2.560  -2.460   4.644  1.00  0.00
ATOM     88  H   MOL     1      -4.828   1.908   0.868  1.00  0.00
ATOM     89  H   MOL     1      -5.672   0.360   0.348  1.00  0.00
ATOM     90  H   MOL     1      -0.556   2.800   0.552  1.00  0.00
ATOM     91  H   MOL     1      -2.160   2.604  -0.364  1.00  0.00
ATOM     92  H   MOL     1      -0.544   2.496  -1.280  1.00  0.00
ATOM     93  H   MOL     1      -5.344   0.992  -2.088  1.00  0.00
ATOM     94  H   MOL     1      -4.492   2.536  -1.584  1.00  0.00
ATOM     95  H   MOL     1      -6.260   2.292  -1.196  1.00  0.00
ATOM     96  H   MOL     1      -4.256  -2.672   2.668  1.00  0.00
ATOM     97  H   MOL     1      -4.480  -1.112   1.712  1.00  0.00
ATOM     98  H   MOL     1      -4.684  -1.120   3.544  1.00  0.00
ATOM     99  H   MOL     1       0.656   0.504  -6.764  1.00  0.00
ATOM    100  H   MOL     1       1.924   1.824  -6.676  1.00  0.00
ATOM    101  H   MOL     1       0.424   2.064  -7.696  1.00  0.00
ATOM    102  H   MOL     1      -1.996   2.436  -4.844  1.00  0.00
ATOM    103  H   MOL     1      -1.640   0.888  -5.740  1.00  0.00
ATOM    104  H   MOL     1      -1.788   2.464  -6.668  1.00  0.00
ATOM    105  H   MOL     1       1.436   3.972  -5.416  1.00  0.00
ATOM    106  H   MOL     1      -0.172   4.204  -4.588  1.00  0.00
ATOM    107  H   MOL     1      -0.068   4.236  -6.416  1.00  0.00
ATOM    108  H   MOL     1      -4.816  -1.472  -3.140  1.00  0.00
ATOM    109  H   MOL     1      -4.664  -1.244  -1.320  1.00  0.00
ATOM    110  H   MOL     1      -4.684  -2.940  -2.048  1.00  0.00
ATOM    111  H   MOL     1      -2.916  -3.304  -3.928  1.00  0.00
ATOM    112  H   MOL     1      -0.684  -2.324  -6.288  1.00  0.00
ATOM    113  H   MOL     1      -2.132  -3.400  -5.964  1.00  0.00
ATOM    114  H   MOL     1      -0.660  -4.076  -6.824  1.00  0.00
ATOM    115  H   MOL     1       1.620  -4.088  -3.828  1.00  0.00
ATOM    116  H   MOL     1       1.508  -2.768  -5.084  1.00  0.00
ATOM    117  H   MOL     1       1.448  -4.528  -5.608  1.00  0.00
ATOM    118  H   MOL     1      -1.984  -5.244  -4.224  1.00  0.00
ATOM    119  H   MOL     1      -0.432  -5.496  -3.288  1.00  0.00
ATOM    120  H   MOL     1      -0.508  -5.940  -5.060  1.00  0.00
TER     121      MOL     1 
END   
